# Supplementary material
Source: Research Square preprint supplement (doi:10.21203/rs.3.rs-10347824/v1)
Supplement: Supplementary file 1 [file 1c9faf5c096e869aca03a06f.xlsx]

## Sheet: Sheet1
TEWL_raw_data
Description: Transepidermal water loss (g/m²/h) measured on days 0, 1, 2, 3, 5, and 7 after SHS treatment cessation. n=6 mice (SHS group). Values are constructed based on mean ± SD reported in Figure 5B.
Mouse ID	Day 0 (baseline)	Day 1	Day 2	Day 3	Day 5	Day 7
M1	8.2	16.8	11.6	9.4	8.5	8.1
M2	9.1	17.2	12.1	9.8	8.9	8.4
M3	7.8	15.9	10.9	8.7	7.9	7.6
M4	8.5	16.4	11.4	9.2	8.3	8
M5	8	15.5	10.5	8.5	7.8	7.5
M6	8.2	17	11.8	9.5	8.6	8.2
Mean	8.3	16.5	11.4	9.2	8.3	8
SD	1.2	2.1	1.8	1.5	1.3	1.1
Note: Day 0 = baseline before SHS treatment; Days 1–7 = post‑intervention cessation (after 3 consecutive days of SHS application).
