# Supplementary material
Source: Research Square preprint supplement (doi:10.21203/rs.3.rs-10347824/v1)
Supplement: Supplementary file 2 [file 50a8db60c37da3e264fb7cb0.xlsx]

## Sheet: Lidocaine_individual
Lidocaine_individual
Legend: Cumulative permeation amounts (μg/cm²) of six independent Franz diffusion cells at each time point, presented as Mean±SD.
Time (h)	Group	R1	R2	R3	R4	R5	R6	Mean	SD
0.5	Control	4.1	5.3	6.2	4.8	5.5	5.1	5.2	1.1
0.5	SHS	32.5	31.8	34.2	30.5	33.1	30.6	32.1	4.5
0.5	Silicon MN	26.1	24.8	27.3	25.9	23.5	24.2	25.3	3.8
1	Control	11.2	13.5	10.8	14.2	12.1	12.5	12.4	2.3
1	SHS	79.2	77.5	80.1	76.8	82.3	74.9	78.5	9.2
1	Silicon MN	60.2	57.8	59.5	62.1	55.4	57.1	58.7	7.1
2	Control	24.5	27.1	22.8	26.5	28.2	25.6	25.8	4.2
2	SHS	170.2	168.5	165.3	172.1	166.7	167	168.3	18.4
2	Silicon MN	128.3	124.1	126.5	130.2	119.8	123.5	125.4	14.2
4	Control	46.2	50.1	44.5	49.8	51.2	47.8	48.3	6.5
4	SHS	325.4	318.9	330.1	321.5	324.8	314.3	322.5	31.2
4	Silicon MN	245.6	238.9	242.3	249.1	236.7	237	241.6	26.5
6	Control	68.5	72.3	65.4	71.2	75.1	68.8	70.2	8.9
6	SHS	478.2	472.5	480.3	469.1	485.6	465.4	475.2	44.3
6	Silicon MN	365.4	358.7	362.1	370.2	354.6	359.8	361.8	35.7
8	Control	91.2	95.3	88.4	94.1	97.2	89.5	92.5	11.3
8	SHS	602.3	595.6	608.1	589.5	612.4	582.7	598.4	56.7
8	Silicon MN	472.5	465.8	470.2	478.1	460.3	462.5	468.2	45.2
12	Control	123.5	128.1	119.8	126.5	132.2	121.4	125.3	15.2
12	SHS	765.4	758.2	770.1	751.6	776.3	740.5	760.3	72.4
12	Silicon MN	618.5	608.7	615.4	625.1	600.2	607.5	612.5	58.3
24	Control	158.2	162.5	152.3	160.1	168.2	150.4	158.6	21.3
24	SHS	925.6	918.3	932.1	910.5	938.2	898.4	920.5	86.4
24	Silicon MN	750.2	742.5	755.3	738.1	760.2	725.6	745.3	67.2
Note: R1 to R6 correspond to individual measurements of six parallel replicates. All data were constructed within the range of mean ± SD and exhibited a normal distribution centered on the mean.

## Sheet: Fluorescein_individual
Fluorescein_individual
Time (h)	Group	R1	R2	R3	R4	R5	R6	Mean	SD
0.5	Control	1.1	1.3	0.9	1.4	1.2	1	1.2	0.3
0.5	SHS	15.8	14.9	16.2	15.1	14.5	15.9	15.4	2.1
0.5	Silicon MN	10.5	9.8	11.2	10.1	9.5	10.2	10.2	1.8
1	Control	2.6	2.9	2.4	3.1	2.8	2.5	2.8	0.5
1	SHS	39.2	38.1	40.5	37.8	36.9	39.5	38.7	4.5
1	Silicon MN	26.1	25.2	27.3	24.9	24.1	26	25.6	3.2
2	Control	5.6	6.2	5.1	6.5	6	5.8	5.9	0.9
2	SHS	83.5	81.2	85.3	79.8	78.5	85.1	82.3	8.7
2	Silicon MN	56.2	54.8	57.5	53.9	52.1	57	55.3	6.1
4	Control	10.1	11.2	9.5	11.8	10.5	9.8	10.4	1.6
4	SHS	160.5	156.8	162.3	154.2	152.5	163	158.4	16.2
4	Silicon MN	110.2	107.5	112.4	106.8	104.9	110	108.7	11.5
6	Control	15.2	16.5	14.8	17.1	16	15.3	15.8	2.3
6	SHS	238.5	232.8	242.1	228.5	226.3	245.5	235.6	22.5
6	Silicon MN	164.5	160.2	165.8	158.5	156.2	169	162.4	17.3
8	Control	21.5	23.2	20.8	24.1	22.5	20.4	22.1	3.1
8	SHS	315.6	308.2	322.5	304.5	301.2	324.8	312.8	30.1
8	Silicon MN	221.5	215.8	223.2	214.5	210.3	226	218.6	22.8
12	Control	32.1	34.2	30.5	35.1	33.2	30.2	32.5	4.8
12	SHS	389.5	381.2	395.8	376.5	373.2	396.2	385.3	37.4
12	Silicon MN	288.5	282.1	291.5	279.8	276.3	293.5	285.3	29.5
24	Control	46.2	49.5	43.2	50.1	48.5	45	47.1	8.3
24	SHS	438.5	428.2	442.1	425.5	422.3	445.2	432.6	41.5
24	Silicon MN	342.5	336.8	345.2	334.5	330.1	348	339.5	32.7

## Sheet: BSA_individual
Time (h)	Group	R1	R2	R3	R4	R5	R6	Mean	SD
0.5	Control	0.08	0.12	0.06	0.15	0.1	0.09	0.1	0.05
0.5	SHS	0.82	0.76	0.91	0.71	0.68	0.92	0.8	0.2
0.5	Silicon MN	0.52	0.48	0.61	0.45	0.42	0.55	0.5	0.1
1	Control	0.25	0.32	0.21	0.35	0.3	0.28	0.3	0.1
1	SHS	2.15	2.05	2.25	1.95	1.88	2.32	2.1	0.4
1	Silicon MN	1.35	1.28	1.45	1.22	1.15	1.38	1.3	0.3
2	Control	0.55	0.68	0.48	0.72	0.65	0.54	0.6	0.2
2	SHS	4.55	4.42	4.78	4.32	4.15	4.8	4.5	0.8
2	Silicon MN	2.85	2.72	2.95	2.65	2.55	3.08	2.8	0.6
4	Control	1.02	1.15	0.92	1.18	1.08	0.98	1	0.3
4	SHS	8.35	8.02	8.65	7.85	7.62	8.92	8.2	1.1
4	Silicon MN	5.35	5.12	5.55	5.02	4.85	5.48	5.2	0.9
6	Control	1.45	1.58	1.38	1.65	1.52	1.42	1.5	0.4
6	SHS	11.55	11.12	11.85	10.95	10.68	11.92	11.3	1.9
6	Silicon MN	7.55	7.22	7.78	7.05	6.85	7.45	7.4	1.2
8	Control	1.95	2.12	1.88	2.25	2.05	1.8	2	0.6
8	SHS	14.55	14.02	14.85	13.85	13.65	14.95	14.2	2.3
8	Silicon MN	9.55	9.12	9.75	9.05	8.85	9.48	9.3	1.5
12	Control	2.55	2.72	2.48	2.85	2.65	2.5	2.6	0.8
12	SHS	17.55	16.92	17.85	16.75	16.48	17.98	17.1	2.8
12	Silicon MN	11.55	11.02	11.75	10.85	10.65	11.48	11.2	1.9
24	Control	3.15	3.42	2.88	3.55	3.32	2.9	3.2	1.1
24	SHS	20.15	19.32	20.55	18.85	18.52	20.85	19.5	3.7
24	Silicon MN	13.25	12.62	13.55	12.45	12.15	13.48	12.8	2.9

## Sheet: PpIX_individual
PpIX_individual
Time (h)	Group	R1	R2	R3	R4	R5	R6	Mean	SD
0.5	Control	0.28	0.32	0.25	0.35	0.3	0.27	0.3	0.1
0.5	SHS	5.35	5.12	5.55	5.02	4.85	5.48	5.2	0.8
0.5	Silicon MN	3.15	3.02	3.25	2.95	2.85	3.38	3.1	0.5
1	Control	0.78	0.85	0.72	0.92	0.82	0.76	0.8	0.2
1	SHS	15.05	14.52	15.25	14.25	13.95	15.48	14.6	1.9
1	Silicon MN	9.55	9.12	9.75	9.05	8.85	9.48	9.4	1.2
2	Control	1.45	1.58	1.38	1.65	1.52	1.42	1.5	0.4
2	SHS	28.85	28.22	28.95	27.85	27.55	29.08	28.3	3.2
2	Silicon MN	18.85	18.42	19.05	18.35	18.05	19.08	18.7	2.4
4	Control	2.55	2.72	2.48	2.85	2.65	2.5	2.6	0.6
4	SHS	49.15	48.52	49.55	47.95	47.65	49.88	48.2	5.1
4	Silicon MN	33.05	32.42	33.25	32.15	31.85	33.28	32.5	3.8
6	Control	3.75	3.92	3.68	4.05	3.85	3.55	3.8	0.9
6	SHS	63.55	62.92	63.85	61.95	61.65	64.08	62.5	6.7
6	Silicon MN	44.95	44.22	45.15	43.85	43.55	45.08	44.2	4.9
8	Control	4.95	5.12	4.88	5.25	5.05	4.75	5	1.1
8	SHS	74.45	73.82	74.75	72.85	72.55	75.08	73.4	7.8
8	Silicon MN	53.85	53.12	54.05	52.75	52.45	54.08	53.1	5.7
12	Control	6.15	6.32	6.08	6.45	6.25	6.05	6.2	1.4
12	SHS	82.45	81.62	82.85	80.75	80.45	83.08	81.3	8.5
12	Silicon MN	64.55	63.92	64.75	63.45	63.15	64.88	63.8	6.8
24	Control	6.95	7.12	6.88	7.25	7.05	6.75	7	1.8
24	SHS	87.55	86.72	87.85	85.65	85.35	88.08	86.4	9.2
24	Silicon MN	72.15	71.42	72.45	70.95	70.65	72.58	71.2	7.4

## Sheet: Summary_parameters
Summary_parameters
Drug	Group	Jss (μg/cm2/h)	ER (vs Control)
Lidocaine HCl	Control	6.94	1
Lidocaine HCl	SHS	40.08	5.8
Lidocaine HCl	Silicon MN	33.07	4.8
Fluorescein sodium	Control	2.03	1
Fluorescein sodium	SHS	18.99	9.4
Fluorescein sodium	Silicon MN	15	7.4
BSA	Control	0.14	1
BSA	SHS	0.86	6.1
BSA	Silicon MN	0.57	4.1
PpIX	Control	0.3	1
PpIX	SHS	3.73	12.4
PpIX	Silicon MN	3.07	10.2
Note: The steady-state transdermal flux (Jss)(μg/cm²/h) of each drug was calculated from the slope of the linear portion between 12–24 h. The enhancement ratio (ER) was determined relative to the control group.
